# Supplementary material
Source: PubMed Central journal article supplement (PMC4874883)
Supplement: NIHMS780203-supplement.pdf [file NIHMS780203-supplement.pdf]

## SUPPLEMENTAL MATETRIAL

**Table S-1.** Association of inflammatory markers [change (95%CI)] with an interquartile range (IQR) increase of **12-hr lagged exposure** of particulate air pollutants in the U.S. trucking industry <sup>a</sup>

| Outcome<br>Inflam.<br>Marker | Exposure<br>Lag<br>period | n   | EC <sup>b</sup> |                 |         |                 | OC <sup>c</sup> |                       |             |                       | PM <sub>2.5</sub> <sup>d</sup> |                 |         |                 |
|------------------------------|---------------------------|-----|-----------------|-----------------|---------|-----------------|-----------------|-----------------------|-------------|-----------------------|--------------------------------|-----------------|---------|-----------------|
|                              |                           |     | Model 1         |                 | Model 2 |                 | Model 1         |                       | Model 2     |                       | Model 1                        |                 | Model 2 |                 |
|                              |                           |     | Change          | (95%CI)         | Change  | (95%CI)         | Change          | (95%CI)               | Change      | (95%CI)               | Change                         | (95% CI)        | Change  | (95% CI)        |
| CRP<br>(mg/L)                | Lag <sub>0-12</sub>       | 136 | 0.19            | (-0.44 to 0.82) | 0.02    | (-0.48 to 0.51) | 0.79            | (-0.73 to 2.30)       | 0.57        | (-0.66 to 1.82)       | 0.73                           | (-0.90 to 2.36) | 0.63    | (-0.82 to 2.07) |
|                              | Lag <sub>12-24</sub>      | 119 | -0.64           | (-1.83 to 0.55) | -0.28   | (-0.94 to 0.38) | -1.18           | (-3.20 to 0.84)       | -0.62       | (-1.84 to 0.60)       | -0.96                          | (-2.47 to 0.55) | -0.68   | (-1.78 to 0.41) |
|                              | Lag <sub>24-36</sub>      | 96  | -0.09           | (-0.54 to 0.36) | -0.63   | (-1.81 to 0.56) | -0.18           | (-1.08 to 0.72)       | -0.80       | (-2.55 to 0.96)       | 0.12                           | (-0.49 to 0.72) | -0.32   | (-1.33 to 0.70) |
|                              | Lag <sub>36-48</sub>      | 72  | -0.21           | (-0.69 to 0.27) | -0.03   | (-0.45 to 0.40) | -0.99           | (-2.90 to 0.92)       | -0.36       | (-1.58 to 0.85)       | -0.46                          | (-1.50 to 0.59) | -0.14   | (-1.05 to 0.77) |
| IL-6<br>(pg/mL)              | Lag <sub>0-12</sub>       | 136 | 0.34            | (-0.12 to 0.80) | 0.23    | (-0.17 to 0.62) | 0.70            | (-0.08 to 1.48)       | 0.55        | (-0.14 to 1.23)       | 0.21                           | (-0.50 to 0.91) | 0.14    | (-0.49 to 0.76) |
|                              | Lag <sub>12-24</sub>      | 119 | -0.65           | (-1.39 to 0.09) | -0.44   | (-1.00 to 0.12) | -0.42           | (-1.52 to 0.69)       | 0.00        | (-0.86 to 0.85)       | -0.55                          | (-1.39 to 0.30) | -0.32   | (-0.97 to 0.33) |
|                              | Lag <sub>24-36</sub>      | 96  | 0.13            | (-0.21 to 0.47) | -0.17   | (-0.74 to 0.40) | 0.72            | (-0.05 to 1.50)       | 0.43        | (-0.56 to 1.42)       | 0.63                           | (-0.03 to 1.29) | 0.38    | (-0.35 to 1.11) |
|                              | Lag <sub>36-48</sub>      | 72  | -0.40           | (-0.85 to 0.04) | -0.32   | (-0.76 to 0.13) | -1.09           | (-2.25 to 0.06)       | -0.90       | (-1.90 to 0.10)       | -0.66                          | (-1.39 to 0.07) | -0.51   | (-1.15 to 0.12) |
| sICAM-1<br>(ng/mL)           | Lag <sub>0-12</sub>       | 136 | -2.63           | (-16.7 to 11.5) | -3.48   | (-16.1 to 9.2)  | -4.48           | (-24.3 to 15.4)       | -5.44       | (-25.1 to 14.2)       | -9.19                          | (-20.7 to 2.3)  | -9.11   | (-20.2 to 2.0)  |
|                              | Lag <sub>12-24</sub>      | 119 | 1.56            | (-12.5 to 15.6) | -1.26   | (-15.5 to 12.9) | <b>16.6</b>     | <b>(-5.2 to 38.4)</b> | <b>14.2</b> | <b>(-7.5 to 35.9)</b> | 1.93                           | (-16.2 to 20.1) | 0.71    | (-16.9 to 18.4) |
|                              | Lag <sub>24-36</sub>      | 96  | 4.72            | (-6.6 to 16.0)  | 9.24    | (-0.9 to 19.4)  | <b>18.7</b>     | <b>(-4.7 to 42.2)</b> | <b>22.9</b> | <b>(1.2 to 44.6)</b>  | 5.81                           | (-13.5 to 25.1) | 8.97    | (-9.7 to 27.7)  |
|                              | Lag <sub>36-48</sub>      | 72  | -7.93           | (-18.6 to 2.7)  | -8.86   | (-17.8 to 0.1)  | -2.74           | (-33 to 27.5)         | -11.3       | (-40.5 to 18)         | -7.92                          | (-27.9 to 12.1) | -10.1   | (-28.7 to 8.4)  |

<sup>a</sup> Linear regression model using robust variance; Each 12-hr lagged exposure level was included in separate models (i.e., each model included only one 12-hr lagged exposure variable).

Model 1 adjusted for age (quartile), race, sex, obesity (BMI≥30), exercise (>2hrs/wk), smoking status, secondhand smoke exposure in the past 24 hrs, and cholesterol drug use.

Model 2 additionally adjusted for recent illness, time of blood draw, high blood pressure, chronic pulmonary illness, and hey fever.

<sup>b</sup> Corresponds to an IQR increase of Lag<sub>0-12</sub> EC: 0.16 µg/m<sup>3</sup>

<sup>c</sup> Corresponds to an IQR increase of Lag<sub>0-12</sub> OC: 3.47 µg/m<sup>3</sup>

<sup>d</sup> Corresponds to an IQR increase of Lag<sub>0-12</sub> PM<sub>2.5</sub>: 6.85 µg/m<sup>3</sup>

**Table S-2.** Association of inflammatory markers [change (95%CI)] with an interquartile range (IQR) increase of **24-hr and 48-hr moving averages** of particulate air pollutants in the U.S. trucking industry <sup>a</sup>

| Inflam. Marker  | Exposure Lag period | n   | EC <sup>b</sup> |                 | OC <sup>c</sup> |                        | PM <sub>2.5</sub> <sup>d</sup> |                 |
|-----------------|---------------------|-----|-----------------|-----------------|-----------------|------------------------|--------------------------------|-----------------|
|                 |                     |     | Change          | (95%CI)         | Change          | (95%CI)                | Change                         | (95% CI)        |
| CRP (mg/L)      | 0-24 hrs            | 119 | -0.57           | (-1.98 to 0.83) | -0.18           | (-1.56 to 1.21)        | 1.01                           | (-1.68 to 3.71) |
|                 | 12-36 hrs           | 110 | -0.90           | (-2.65 to 0.84) | -3.05           | (-9.14 to 3.04)        | -1.68                          | (-4.67 to 1.32) |
|                 | 24-48 hrs           | 72  | -0.55           | (-1.57 to 0.47) | -3.31           | (-8.66 to 2.04)        | -1.11                          | (-3.60 to 1.38) |
|                 | 0-48 hrs            | 72  | -1.17           | (-3.31 to 0.96) | -3.03           | (-7.61 to 1.55)        | -0.01                          | (-2.07 to 2.06) |
| IL-6 (pg/mL)    | 0-24 hrs            | 119 | -0.26           | (-1.11 to 0.59) | 1.38            | (-0.07 to 2.83)        | 0.17                           | (-1.23 to 1.58) |
|                 | 12-36 hrs           | 110 | -0.42           | (-1.41 to 0.57) | 0.84            | (-2.00 to 3.68)        | 0.17                           | (-1.52 to 1.85) |
|                 | 24-48 hrs           | 72  | -0.47           | (-1.05 to 0.11) | -1.55           | (-4.08 to 0.98)        | -0.56                          | (-1.80 to 0.68) |
|                 | 0-48 hrs            | 72  | -0.64           | (-1.69 to 0.41) | -0.76           | (-3.15 to 1.64)        | 0.19                           | (-1.22 to 1.60) |
| sICAM-1 (ng/mL) | 0-24 hrs            | 119 | -3.8            | (-30.0 to 22.3) | 18.7            | (-30.2 to 67.6)        | -27.2                          | (-59.5 to 5.1)  |
|                 | 12-36 hrs           | 110 | 12.1            | (-7.1 to 31.3)  | <b>75.7</b>     | <b>(33.5 to 117.9)</b> | 13.3                           | (-17.7 to 44.2) |
|                 | 24-48 hrs           | 72  | -1.3            | (-22.5 to 19.9) | 50.5            | (-12.2 to 113.1)       | 2.9                            | (-42.2 to 47.9) |
|                 | 0-48 hrs            | 72  | 3.4             | (-29.7 to 36.6) | <b>77.2</b>     | <b>(11.3 to 143.0)</b> | 1.1                            | (-55.9 to 58.1) |

<sup>a</sup> Linear regression model using robust variance; adjusted for age (quartile), race, sex, obesity (BMI≥30), exercise (>2hrs/wk), smoking status, secondhand smoke exposure in the past 24 hrs, and cholesterol drug use.

<sup>b</sup> Corresponds to an IQR increase of Lag<sub>0-12</sub> EC: 0.16 µg/m<sup>3</sup>

<sup>c</sup> Corresponds to an IQR increase of Lag<sub>0-12</sub> OC: 3.47 µg/m<sup>3</sup>

<sup>d</sup> Corresponds to an IQR increase of Lag<sub>0-12</sub> PM<sub>2.5</sub>: 6.85 µg/m<sup>3</sup>

**Table S-3.** Results from **multiple-lag models** examining association of inflammatory markers [change (95%CI)] with an interquartile range increase of air pollutants in the U.S. trucking industry <sup>a</sup>

| Inflam.            | Exposure                    | EC <sup>b</sup> |                     | OC <sup>c</sup> |                        | PM <sub>2.5</sub> <sup>d</sup> |                 |
|--------------------|-----------------------------|-----------------|---------------------|-----------------|------------------------|--------------------------------|-----------------|
| Marker             | Period                      | Change          | (95%CI)             | Change          | (95%CI)                | Change                         | (95% CI)        |
| CRP<br>(mg/L)      | Lag <sub>0-12</sub>         | -1.37           | (-3.48, 0.75)       | -1.23           | (-3.87, 1.41)          | -0.24                          | (-1.61, 1.13)   |
|                    | Lag <sub>12-24</sub>        | 1.09            | (-0.57, 2.74)       | 0.82            | (-1.90, 3.54)          | 1.82                           | (-1.20, 4.84)   |
|                    | Lag <sub>24-36</sub>        | -0.81           | (-2.23, 0.6)        | -3.05           | (-8.23, 2.13)          | -2.91                          | (-8.02, 2.20)   |
|                    | Lag <sub>36-48</sub>        | 0.61            | (-0.76, 1.98)       | 1.70            | (-1.62, 5.02)          | 1.30                           | (-1.26, 3.86)   |
|                    | Work hour before blood draw | 1.37            | (-0.76, 3.49)       | 1.57            | (-0.89, 4.03)          | 1.60                           | (-0.96, 4.15)   |
| IL-6<br>(pg/mL)    | Lag <sub>0-12</sub>         | -0.29           | (-1.22, 0.64)       | -0.65           | (-2.02, 0.71)          | -0.40                          | (-1.16, 0.37)   |
|                    | Lag <sub>12-24</sub>        | 0.64            | (-0.56, 1.85)       | 2.40            | (-0.10, 4.90)          | 2.04                           | (-0.04, 4.13)   |
|                    | Lag <sub>24-36</sub>        | -0.17           | (-0.76, 0.43)       | -0.54           | (-2.74, 1.65)          | -0.40                          | (-2.57, 1.76)   |
|                    | Lag <sub>36-48</sub>        | -0.03           | (-0.82, 0.76)       | -0.92           | (-3.64, 1.80)          | -0.07                          | (-1.46, 1.31)   |
|                    | Work hour before blood draw | 0.51            | (-0.40, 1.41)       | 0.74            | (-0.34, 1.81)          | 0.83                           | (-0.33, 1.98)   |
| sICAM-1<br>(ng/mL) | Lag <sub>0-12</sub>         | -0.10           | (-12.61, 12.41)     | -2.19           | (-40.43, 36.06)        | -13.73                         | (-36.36, 8.90)  |
|                    | Lag <sub>12-24</sub>        | <b>27.92</b>    | <b>(0.06, 55.9)</b> | <b>57.77</b>    | <b>(12.20, 103.40)</b> | 30.15                          | (-12.54, 72.83) |
|                    | Lag <sub>24-36</sub>        | <b>11.91</b>    | <b>(0.95, 22.9)</b> | <b>45.71</b>    | <b>(19.43, 71.99)</b>  | 25.57                          | (-4.28, 55.41)  |
|                    | Lag <sub>36-48</sub>        | -12.96          | (-29.46, 3.55)      | -15.01          | (-65.87, 35.85)        | -13.27                         | (-39.12, 12.58) |
|                    | Work hour before blood draw | 1.51            | (-9.16, 12.18)      | 1.77            | (-11.84, 15.37)        | 3.40                           | (-12.97, 19.76) |

<sup>a</sup> Linear regression model using robust variance; adjusted for duration of work before blood draw, age (quartile), race, sex, obesity (BMI≥30 kg/m<sup>2</sup>), exercise (>2hrs/wk), smoking status, secondhand smoke exposure in the past 24 hrs, and cholesterol drug use.

<sup>b</sup> Corresponds to an IQR increase of Lag<sub>0-12</sub> EC: 0.16 µg/m<sup>3</sup>

<sup>c</sup> Corresponds to an IQR increase of Lag<sub>0-12</sub> OC: 3.47 µg/m<sup>3</sup>

<sup>d</sup> Corresponds to an IQR increase of Lag<sub>0-12</sub> PM<sub>2.5</sub>: 6.85 µg/m<sup>3</sup>

**Table S-4.** Associations between **un-weighted exposure levels measured by area samplers operating during a worker's work shift on the day of blood draw** and inflammatory markers [change (95%CI)] <sup>a</sup>

| Inflam.<br>Marker | EC <sup>b</sup> |               | OC <sup>c</sup> |               | PM <sub>2.5</sub> <sup>d</sup> |               |
|-------------------|-----------------|---------------|-----------------|---------------|--------------------------------|---------------|
|                   | Change          | (95%CI)       | Change          | (95%CI)       | Change                         | (95% CI)      |
| CRP (mg/L)        | -0.26           | (-0.73, 0.21) | -0.08           | (-0.78, 0.61) | 0.21                           | (-0.61, 1.04) |
| IL-6 (pg/mL)      | 0.02            | (-0.25, 0.3)  | 0.51            | (-0.15, 1.16) | -0.21                          | (-0.67, 0.25) |
| sICAM-1 (ng/mL)   | -5.44           | (-13.3, 2.41) | -1.22           | (-23.8, 21.4) | -7.95                          | (-19.4, 3.56) |

<sup>a</sup> Linear regression model using robust variance; adjusted for duration at work before blood draw, age (quartile), race, sex, obesity (BMI $\geq$ 30 kg/m<sup>2</sup>), exercise (>2hrs/wk), smoking status, secondhand smoke exposure in the past 24 hrs, and cholesterol drug use.

<sup>b</sup> Corresponds to an IQR increase of un-weighted area EC levels during work shift on the day of blood draw: 0.24  $\mu$ g/m<sup>3</sup>

<sup>c</sup> Corresponds to an IQR increase of un-weighted area OC levels during work shift on the day of blood draw: 5.65  $\mu$ g/m<sup>3</sup>

<sup>d</sup> Corresponds to an IQR increase of un-weighted area PM<sub>2.5</sub> levels during work shift on the day of blood draw: 10.45  $\mu$ g/m<sup>3</sup>
